# Supplementary material for: Leptin-Induced JAK/STAT Signaling and Cancer Growth
Source: Vaccines (Basel). 2016 Jul 26;4(3):26. doi: 10.3390/vaccines4030026 (PMC5041020; doi:10.3390/vaccines4030026)
Supplement: Supplementary file 1 [file vaccines-04-00026-s001.xlsx]

## Sheet: Sheet1
Relation	Type	Sentence	TextRef	Connectivity	# of References
ERBB2 --+> CANCER	Regulation	Tyrosine kinase signaling appears to play a significant role in the regulation of androgen-independent prostate cancer growth, as HER-2 protein may be elevated in a subgroup of advanced human prostate cancer and increases as prostate tumors progress to androgen independence ., ErbB-2 overexpression promotes the survival and growth of prostate cancer cells through the MAPK and/or phosphatidylinosi…	info:pmid/16076555#body:16, info:doi/10.2353/ajpath.2010.100228#body:10, info:pmid/14735191#abs:1, info:pmid/11547123#abs:2, info:pmid/1353965#abs:2, info:pmid/11786427#abs:2, info:pmid/21755295#abs:1, info:pmid/19318561#abs:1, info:pmid/12429632#abs:2, info:pmid/10318905#abs:2 <more data available...>	2	12
VEGFA ---> CANCER	Regulation	These results show that low-dose, whole-body radiation and VEGF can be used in concert safely and effectively to facilitate growth of PC-3 prostate tumor and that the mechanisms of interaction may involve leukocyte modulation., Scale bar=10 mm. (G) VEGF165b reduced prostate tumour growth in a xenograft mouse model., Inhibition of vascular endothelial cell growth factor suppresses the in vivo grow…	info:pmid/9137429#abs:7, info:pmid/18349828#body:121, info:pmid/21227046#title:1, info:pmid/21034500#body:342, info:pmid/22045472#cont:91, info:pmid/18667687#body:90, info:pmid/19166822#body:117, info:pmid/10213213#abs:12, info:pmid/17437444#abs:9, info:pmid/14734476#abs:13 <more data available...>	2	17
TGFBR1 ---> CANCER	Regulation	The over expression of TGFbeta-RI and RII in high-grade Prostatic intraepithelial neoplasia cells as well as TGF-beta1 in stromal tissue subjacent to high-grade Prostatic intraepithelial neoplasia implicated a growth-stimulating role instead of inhibiting role of this peptide growth factor during the early stage of prostatic neoplasia., Decreased expression of TGF-ßRI and RII has been shown to be…	info:pmid/11102953#abs:14, info:pmid/20727350#body:197, info:pmid/15183988#body:85	2	3
CAV1 --+> CANCER	Regulation	Mechanistically, we showed that loss or down-regulation of Cav-1 expression results in increased apoptosis, with increased prostate apoptosis response factor-4 and PTEN levels in Cav-1(-/-) null prostate tumors., Genetic ablation of Cav-1 in TRAMP mice decreased the incidence of prostate tumors at 28 weeks and reduced metastasis to regional lymph-nodes and distant organs [83]., Caveolin-1 promote…	info:pmid/15802273#abs:9, info:pmid/21318118#cont:260, info:pmid/19333235#body:250, info:pmid/22940132#body:79, info:pmid/17093136#body:278, info:doi/10.1016/S0022-5347(05)00110-2#body:9, info:pmid/22075971#abs:12, info:pmid/19581923#abs:5, info:pmid/16886623#abs:2, info:pmid/20564315#abs:10 <more data available...>	2	15
IL6 --+> CANCER	Regulation	In the epithelium, IL-6, IL-10 and HSP-90 expressions increased from normal prostatic tissue to prostatic neoplasia to CaP., IL-6 promotes prostate tumorigenesis through IGF-IR, It is understood that IL-6 has an antiapoptotic role in most prostate tumors and several previous studies have focused on tumor cells as a source of this cytokine., Interleukin-6 (IL-6) is a multifunctional regulator of c…	info:pmid/17094460#abs:5, info:pmid/21258401#cont:31, info:pmid/19683299#body:3, info:pmid/16998813#abs:1, info:pmid/18303206#abs:2, info:pmid/11312117#abs:2, info:pmid/15313471#abs:6, info:pmid/15659804#abs:2, info:pmid/19721171#abs:3, info:pmid/19189403#abs:13 <more data available...>	2	13
EGR1 --+> CANCER	Regulation	Egr1 deletion impairs prostate tumorigenesis ( )., Antisense to the early growth response-1 gene (Egr-1) inhibits prostate tumor development in TRAMP mice., Thus EGR1 overexpression may promote prostate tumorigenesis at least in part by modulating androgen receptor function., Egr-1 gene deletion in mice results in suppression of prostate tumorigenesis caused by the SV40 T-antigen transgene of the…	info:pmid/21620777#body:55, info:pmid/14751836#title:1, info:pmid/12890669#body:68, info:pmid/12850523#body:153, info:pmid/12556466#body:64, info:pmid/14985468#abs:2, info:pmid/12833142#abs:8, info:pmid/19792968#abs:3, info:pmid/22115966#abs:1, info:pmid/21743958#abs:9 <more data available...>	2	13
TGFBR2 ---> CANCER	Regulation	Dysfunctional transforming growth factor-beta receptor II accelerates prostate tumorigenesis in the TRAMP mouse model., Furthermore, knockout of TGFßRII in FSP-1-positive cells promoted prostate neoplasia and forestomach squamous cell carcinoma ., Loss of TGF-ß type II receptor (TßRII, encoded by Tgfbr2) expression in the prostate stroma contributes to prostate cancer initiation, progression, and…	info:pmid/19738062#title:1, info:pmid/23123598#body:58, info:pmid/22290877#abs:1, info:pmid/9876767#abs:9, info:doi/10.1016/j.bbadis.2012.10.013#body:58, info:pmid/15183988#body:85, info:pmid/20727350#body:212	2	7
MTOR ---> CANCER	Regulation	These results suggested that the mTOR signaling plays an essential role in the tumorigenesis of prostate cancer and mTOR specific inhibitors may be promising anticancer therapeutics., Collectively, our data suggest that Mammalian target of rapamycin complex 2 plays an important role in prostate cancer development and aloe-emodin suppresses prostate cancer progression by targeting Mammalian target…	info:pmid/22842629#body:92, info:pmid/22532249#abs:8, info:pmid/22815832#abs:8, info:pmid/18725989#body:155, info:pmid/16230612#body:39, info:doi/10.1016/j.ejcsup.2008.06.023#body:115, info:doi/10.1016/j.bcp.2012.07.012#body:96, info:pmid/16765945#body:134	2	8
STAT3 --+> CANCER	Regulation	Plasmid-based Stat3 siRNA delivered by hydroxyapatite nanoparticles suppresses mouse prostate tumour growth in vivo., Cooperation between Stat3 and Akt signaling leads to prostate tumor development in transgenic mice., Most recently, Ser727-phosphorylated and Tyr705-dephosphorylated STAT3 is shown to promote prostate tumorigenesis (43)., Down-regulation of signal transducer and activator of trans…	info:pmid/21297658#title:1, info:pmid/21390188#title:1, info:pmid/21952584#cont:703, info:pmid/19875458#body:253, info:pmid/16144938#title:1, info:pmid/18227858#body:479, info:pmid/18829527#title:1, info:pmid/18349842#body:323, info:pmid/16804520#body:267, info:pmid/15647107#abs:4 <more data available...>	2	16
CDK2 ---| CANCER	Regulation	Discussion Top Abstract Methods Results Discussion References In this study we have shown that the loss of the cyclin-cdk2 binding function of p27 accelerates prostate tumorigenesis even when the Rb and p53 pathways have been inactivated by expression of large T antigen.	info:pmid/15615849#body:215	2	1
ERG --+> CANCER	Regulation	We report here that up-regulation of ERG transcript is sufficient for the initiation of prostate neoplasia., This results in ERG overexpression, which may have a direct causal role in prostate tumorigenesis or progression., Our results provide direct evidence for selective cooperating events in ERG-induced prostate tumorigenesis and offer a rational basis for combined therapeutic interventions ag…	info:pmid/18245377#abs:2, info:pmid/19190343#abs:2, info:pmid/19592505#abs:8, info:pmid/21178489#cont:93, info:pmid/21248480#cont:56, info:pmid/24152433#cont:137, info:pmid/21377967#abs:3, info:pmid/17143509#abs:10, info:pmid/17079440#abs:1, info:pmid/18676740#abs:12 <more data available...>	2	13
MMP2 ---> CANCER	Regulation	Thus, the control of cell surface localization and activation of MMP-2 is expected to be critical in prostatic neoplasia., MMP1 and MMP2 may protect against prostate cancer development and MMP9 may be related to higher risk., Our data indicated that matrix metalloproteinase2-1306C>T gene polymorphism contributes to prostate cancer susceptibility., The expression of MMP2 and MMP9 may play an impor…	info:pmid/14760014#body:68, info:pmid/19303106#abs:10, info:pmid/22374248#abs:10, info:pmid/15934460#abs:4, info:pmid/12168874#abs:11, info:pmid/9495366#abs:11, info:pmid/10825281#body:98, info:pmid/22200661#cont:306, info:pmid/19303110#body:49, info:pmid/15694866#body:70	2	10
RB1 ---| CANCER	Regulation	Using genetically engineered mice, we now show that disruption of the ribosomal protein-Mdm2-p53 pathway by an Mdm2(C305F) mutation does not accelerate prostatic tumorigenesis induced by inactivation of the pRb family proteins (pRb/p107/p130)., These results suggest that inactivation of a putative tumor suppressor gene(s) including the RB1 gene on 13q14 plays an important role in human prostate c…	info:pmid/21747916#abs:5, info:pmid/10451697#abs:7, info:pmid/10713671#abs:10, info:pmid/21099110#title:1, info:pmid/9302175#body:105, info:pmid/23233783#cont:326, info:pmid/19393705#body:155	2	7
TNFSF10 ---| CANCER	Regulation	Furthermore, in vivo administration of AdFlt-TRAIL at the site of tumor growth in combination with radiation treatment produced significant suppression of the growth of DU145 human prostate tumor xenografts in athymic nude mice., Thus, TRAIL in combination with agents that down-regulate Akt activity can be used to treat prostate cancer., Thus, combined treatment with tunicamycin and TRAIL may be …	info:pmid/15564138#abs:7, info:pmid/11461904#abs:14, info:pmid/16024639#abs:12, info:pmid/11420695#abs:2, info:pmid/15287092#abs:11, info:pmid/22462553#abs:2, info:pmid/14729063#abs:4, info:pmid/11850832#abs:8, info:pmid/12811515#abs:13, info:pmid/17289836#body:77	2	10
TGFB2 ---> CANCER	Regulation	Prostate cancer eventually becomes androgen-independent, suggesting that growth factors such as TGF beta 1-3 may potentially contribute to prostate neoplasia., prostate specific antigen-mediated activation of latent TGFbeta2 may be an important mechanism for autocrine TGFbeta regulation in the prostate and may potentially contribute to the formation of osteoblastic lesions in bone metastatic pros…	info:pmid/9316654#abs:1, info:pmid/15389580#abs:10, info:doi/10.1016/j.urolonc.2004.11.004#body:10, info:pmid/16260274#body:93	2	4
TGFB1I1 ---> CANCER	Regulation	Epithelial Hic-5/ARA55 expression contributes to prostate tumorigenesis and castrate responsiveness., We hypothesized that ARA55 might play an important role in prostate cancer development or progression., Hic-5 involvement in various fibrotic disorders, e.g., scar formation, keloid formation and glomerulosclerosis, has been proposed. siRNA silencing of Hic-5 in a breast cancer cell line reduces …	info:pmid/20818421#title:1, info:pmid/12858356#abs:3, info:pmid/22472216#abs:5, info:pmid/11532379#body:6	2	4
LEP ---> CANCER	Regulation	Overall, this work suggests that adiponectin, leptin, and their receptors may play an important role in prostate cancer., Our results suggest that leptin might have a promoting effect on the carcinogenesis and progression of prostate cancer., Prostate cancer cell lines DU145 and PC-3 (androgen-resistant) were treated with leptin over time., Leptin stimulation may be selective for either pathway t…	info:pmid/20225764#abs:5, info:pmid/18958356#abs:11, info:pmid/15546570#abs:3, info:pmid/15093720#abs:13, info:pmid/12629349#abs:9, info:pmid/18341625#abs:2, info:pmid/18279445#abs:9, info:pmid/11238530#body:171, info:pmid/12902351#body:98	2	9
RAF1 ---> CANCER	Regulation	Raf-1 expression may influence progression to androgen insensitive prostate cancer., Interestingly, Ras/Raf activation also elicits growth arrest in certain malignant tumor cell lines, mainly derived from medullary thyroid carcinoma, small cell lung carcinoma, pheochromocytoma, glioma, and prostate carcinoma (14-24)., Ras/Raf also induced LIF expression in small cell lung carcinoma cell lines, NC…	info:pmid/15666389#title:1, info:pmid/19805545#body:42, info:pmid/15572029#body:121	2	3
GHRH --+> CANCER	Regulation	Antagonists of growth hormone-releasing hormone (GHRH) have been shown to inhibit human experimental prostate cancers., Our findings suggest that the use of a combination of antagonists of GHRH and LHRH could improve the therapy for androgen sensitive prostate cancer., Antagonists of growth hormone releasing hormone (GHRH) as well as antagonists of bombesin/gastrin releasing peptide inhibit the g…	info:pmid/21796649#abs:2, info:pmid/17624923#abs:10, info:pmid/15754342#abs:1, info:pmid/21321192#abs:3, info:pmid/12538853#body:203, info:pmid/12538852#body:203, info:pmid/9671770#title:1, info:pmid/22572547#cont:29, info:doi/10.1016/j.juro.2012.02.875#body:3, info:pmid/16291086#body:77	2	10
MAPK3 ---> CANCER	Regulation	This regulation of Akt and ERK1/2 may account for the effects on proliferation and also may affect other steps in prostate cancer progression.	info:pmid/20580776#body:115	2	1
STAT1 ---> CANCER	Regulation	These results offer the first evidence that Stat1, and its subsequent regulation of clusterin, are essential for docetaxel resistance in prostate cancer., Patterson et al. reported that STAT1 and its subsequent regulation of clusterin are essential to the resistance of prostate cancer to docetaxel.	info:pmid/16652143#abs:11, info:pmid/17085014#body:237	2	2
JAK2 --+> CANCER	Regulation	The JAK2 V617F mutation was not found in any of the normal or malignant prostate samples analyzed in this study.Conclusions: Future work should focus on determining the molecular mechanisms other than V617F mutation of Jak2 resulting in continuous Stat5 activation in clinical prostate cancers., This is important because the newly developed Jak2 inhibitors may provide the therapeutic means to targ…	info:pmid/20966544#abs:8, info:pmid/20167868#body:226	2	2
IGF1 --+> CANCER	Regulation	Insulin-like growth factor (IGF-1) plays an important role in prostate cancer development., Thus, IGF-1 action appears to be important for prostate cancer initiation., Here we show that the stromal IGF-I certainly regulates the development of prostate cancer., There is growing evidence that IGF-1 and binding proteins may be involved in prostate cancer promotion and progression., Functional intera…	info:pmid/16970944#abs:1, info:pmid/15562830#abs:4, info:pmid/16618768#abs:3, info:pmid/16847815#abs:1, info:pmid/22495974#abs:2, info:pmid/11739433#abs:1, info:pmid/22098108#abs:2, info:pmid/11106682#abs:12, info:pmid/16141391#abs:2, info:pmid/18598360#abs:2	2	10
HGF --+> CANCER	Regulation	We further assessed this effect in an in vivo murine tumor model and showed that HGF up-regulated BMP-7 in prostate tumors., Our study examined the in vitro and in vivo responses of a newly discovered HGF/SF antagonist, NK4, on HGF/SF-promoted growth of human prostate cancer cells (PC-3)., In conclusion, the association between the E-cadherin/catenin complex with the HGF/SF receptor c-Met, may in…	info:pmid/18312940#abs:9, info:pmid/12845672#abs:1, info:pmid/11254878#abs:5, info:pmid/17203235#abs:7, info:pmid/15277227#abs:9, info:pmid/19098934#abs:5, info:pmid/16869958#body:92, info:pmid/10875259#body:175, info:doi/10.1016/S0022-5347(01)69893-8#body:49	2	9
OB-R ---> CANCER	Regulation	To identify the roles of CXCL12 and CXCR4 and the associated mechanism involved in perineural invasion of prostate cancer., Here, we illustrate that human telomerase reverse transcriptase (hTERT) promoter-induced CXCR4 knockdown inhibits prostate cancer bone metastasis., CXC chemokine receptor-4 (CXCR4) is closely involved in bone metastasis of prostate cancer, and CXCR4 levels are frequently inc…	info:pmid/18983683#abs:1, info:pmid/18836306#abs:2, info:pmid/18431597#abs:1, info:pmid/18057003#body:88, info:pmid/18316475#body:266, info:pmid/15647826#title:1, info:pmid/16005185#body:84, info:pmid/16099109#body:141, info:pmid/15542430#body:23	2	9
FGFR2 ---> CANCER	Regulation	Restoration of FGF receptor type 2 enhances radiosensitivity of hormone-refractory human prostate carcinoma PC-3 cells., In addition, as will be discussed below, it is unclear whether activation of FGFR-2, the only receptor that binds FGF7, promotes prostate cancer progression ..., Freeman and collaborators have demonstrated that FGFR1 and FGFR2 activation affect the development of prostate cance…	info:pmid/18751387#title:1, info:pmid/15613447#body:201, info:pmid/15282342#body:265, info:pmid/11458116#body:138, info:pmid/16854582#body:135, info:pmid/15509548#body:124	2	6
PTK2 ---> CANCER	Regulation	Through the activation of major oncogenic pathways, FAK promotes the growth, survival, migration, metastasis, and androgen-independence of prostate tumors in vitro and in vivo., ... PC-3 and DU 145 cells as compared with LNCaP cells and together with FAK was shown to contribute to progression and invasion of human prostate cancer ...	info:pmid/21355844#abs:4, info:pmid/18451096#body:234	2	2
MMP9 ---> CANCER	Regulation	The expression of MMP2 and MMP9 may play an important role in the development and metastasis of prostate cancer., In conclusion, these studies show that osteoclast-derived MMP-9 affects prostate tumor growth in the bone microenvironment by contributing to angiogenesis without altering prostate tumor-induced osteolytic or osteogenic changes., ... by the nuclear factor-kappaB downstream target gene…	info:pmid/15934460#abs:4, info:pmid/20332212#abs:7, info:pmid/17786228#body:529, info:pmid/20550708#body:123, info:pmid/17136575#title:1, info:pmid/17409440#title:1, info:pmid/18226269#body:262, info:pmid/22200661#cont:306, info:pmid/22761428#cont:286, info:pmid/21741166#body:101	2	10
IGF1R ---> CANCER	Regulation	Insulin-like growth factor-I receptor (IGF-IR) overexpression may play a role in prostate cancer progression., In preclinical models, both dietary fat reduction and insulin-like growth factor I receptor (IGF-1R) blockade individually inhibit prostate cancer xenograft growth., The type I insulin-like growth factor receptor (IGF-IR) and its ligands have been shown to play a critical role in prostat…	info:pmid/19738069#abs:1, info:pmid/22562985#abs:1, info:pmid/15837762#abs:1, info:pmid/18598360#abs:2, info:pmid/16639715#abs:1, info:pmid/22903612#abs:9, info:pmid/20840329#abs:11, info:pmid/18079205#body:235, info:pmid/15499378#title:1	2	9
EGF ---> CANCER	Regulation	The epidermal growth factor (EGF) plays a role in the development of prostate cancer, which becomes essential after androgen resistance has emerged., Systemic delivery of EGF-SubA results in a significant inhibition of human breast and prostate tumor xenografts in mouse models., The results of the present study suggest that IL-6 and EGF may enhance prostate carcinogenesis in vitro by preferential…	info:pmid/15281092#abs:1, info:pmid/19881952#abs:4, info:pmid/9609548#abs:12, info:pmid/14991862#abs:1, info:pmid/12713136#abs:4, info:pmid/18297804#abs:8, info:pmid/16108016#abs:9, info:pmid/19098934#abs:5, info:pmid/12794766#abs:1, info:pmid/16406609#abs:3	2	10
TGFB1 --+> CANCER	Regulation	TGF beta can promote and/or suppress prostate tumor growth through multiple and opposing actions., Therefore, TGF beta 1 may represent a new therapeutic target in prostate cancer., Consequently, TGFbeta1 appears to be important in prostate carcinogenesis and tumorigenicity., The prostate cancer cell line LNCaP was treated with TGF-beta in vitro., In contrast, a prostatic carcinoma cell line (PC-3…	info:pmid/12589936#abs:1, info:pmid/7956947#abs:14, info:pmid/9116751#abs:7, info:pmid/18488338#abs:2, info:pmid/2541897#abs:9, info:pmid/1289674#abs:6, info:pmid/9435505#abs:1, info:pmid/9178810#abs:8, info:pmid/7522082#abs:6, info:pmid/1726789#abs:10	2	10
MET ---> CANCER	Regulation	The expression of c-Met, the receptor protein tyrosine kinase for hepatocyte growth factor/scatter factor, frequently increases during prostate tumor progression., Overall, these data suggest that c-Met/HGF receptor and TGF beta R II overexpression may be involved in the differentiation of human prostatic adenocarcinoma, c-Met with de-differentiation and TGF beta R II with differentiation., Other…	info:pmid/14613995#abs:1, info:pmid/9876767#abs:9, info:pmid/9465086#body:55, info:pmid/20085644#body:259	2	4
IGFBP5 --+> CANCER	Regulation	IGFBP-5 protein expression increases in CANCER of the prostate., ... prostate tumor has been shown to involve an alteration in the availability of IGF-I as a result of increased (15-25-fold) production of IGFBP-2 to IGFBP-5 ..., Castration-induced up-regulation of insulin-like growth factor binding protein-5 potentiates insulin-like growth factor-I activity and accelerates progression to androgen…	info:pmid/10218991#body:211, info:pmid/16954429#body:175, info:pmid/10850457#title:1, info:pmid/12777377#body:71, info:pmid/16526944#body:1419, info:pmid/15075235#body:48, info:doi/10.1016/j.urolonc.2011.05.001#body:83	2	7
EP300 ---> CANCER	Regulation	We have shown previously that the transcriptional co-activator p300 is involved in prostate cancer progression., We conclude that p300 plays an important role in prostate cancer cell proliferation, as well as prostate cancer progression., Transcriptional coactivators p300 and CBP stimulate estrogen receptor-beta signaling and regulate cellular events in prostate cancer., CREB binding protein/p300…	info:pmid/15705864#abs:7, info:pmid/14633682#abs:8, info:pmid/20859991#title:1, info:pmid/18433989#body:48, info:pmid/15313417#body:96, info:pmid/20097195#body:2	2	6
TP53 ---> CANCER	Regulation	The rate of p53 alterations increases with prostate cancer progression., The WT p53 gene appears to have a broad role in suppressing prostatic tumorigenesis., Our results suggest that specific p53 mutations participate in the progression of human prostate cancer., These results suggest that mutation of rb or p53 is involved in the genesis or progression of some prostate cancers., This finding imp…	info:pmid/18552821#abs:12, info:pmid/15540784#abs:1, info:pmid/10037428#abs:8, info:pmid/8428341#abs:7, info:pmid/8072122#abs:7, info:pmid/20706288#abs:2, info:pmid/8623924#abs:8, info:pmid/17202838#abs:2, info:pmid/10792001#abs:1, info:pmid/7961118#abs:5	2	10
BAX ---> CANCER	Regulation	We have shown that adenovirus-mediated manipulation of apoptotic genes such as bax could be a therapeutic option for prostate cancer., These results suggest that a second-generation adenovirus-mediated, prostate-specific Bax gene therapy is a promising approach for the treatment of prostate cancer., Further, APG downregulated NF-?B and increased Bax:Bcl-2 ratio in prostate cancer LNCap cells and …	info:pmid/12490000#abs:1, info:pmid/11571575#abs:16, info:pmid/19695221#body:11, info:pmid/10481177#body:38	2	4
IL6R ---> CANCER	Regulation	Our data provide evidence that IL6 may play a role in the growth of benign and malignant prostate tumors and suggest that the IL6 receptor could be a target for the delivery of therapeutic agents in prostate cancer.	info:pmid/7512667#abs:7	2	1
MAPK1 ---> CANCER	Regulation	Our findings indicate that inhibition of PC-3 prostate cancer by JMR-132 involves inactivation of Akt and ERK., Therefore, although rapamycin and PD0325901 effectively inhibit mTOR and ERK MAPK signaling in androgen-dependent prostate cancer, they do not optimally ..., In support of this, Wang et. al. [24] and Kumar et. al. [25] have reported that hypoxia/reoxygenation or oxidative stress induces…	info:pmid/22307626#abs:9, info:pmid/18725989#body:155, info:pmid/19161638#body:216, info:pmid/20580776#body:115, info:pmid/19501628#body:24, info:pmid/10492251#body:122, info:pmid/10688043#body:93	2	7
BCL2 ---> CANCER	Regulation	The expression of Bcl-2psi increased prior to metastasis in higher-grade prostate cancer., Together, these results demonstrate that bcl-2 can facilitate multistep prostate carcinogenesis in vivo., Therefore, bcl-2 provides a strategic target for the development of gene knockout therapies to treat human prostate cancers., These data suggest that altered expression of both Bcl-2 and p53 play a role…	info:pmid/12821128#abs:2, info:pmid/11077442#abs:9, info:pmid/9288183#abs:2, info:pmid/8623924#abs:8, info:pmid/10617870#abs:12, info:pmid/14979207#abs:8, info:pmid/22024950#abs:1, info:pmid/11237705#abs:3, info:pmid/10604265#abs:3, info:pmid/17404601#abs:4	2	10
MDM2 ---> CANCER	Regulation	Regulation of the expressions of p53 and MDM2 should be the promising treatment strategies for relative radioresistant prostate cancer., We also conclude that the overexpression of MDM2 has a role in prostate carcinogenesis, being frequently detected and associated with increased cell proliferation and tumor volume., In summary, this study demonstrates that MDM2 has a role in prostate cancer grow…	info:pmid/17914094#abs:8, info:pmid/11353053#abs:10, info:pmid/13130078#abs:9, info:pmid/21594483#abs:7, info:pmid/15269162#abs:10, info:pmid/12518324#abs:12, info:pmid/20181722#body:72, info:pmid/16754685#body:65, info:pmid/17637390#body:8	2	9
IGF2 ---> CANCER	Regulation	Our data suggest that IGF-II may inhibit both prostate growth and development of prostate cancer., Additionally, the combination of PSA and IGF-II can significantly increase discrimination between benign prostatic hyperplasia and prostate cancer; each p < 0.0001, Wald test., IGF-II mRNA levels progressively increase as prostate cancer cells become more tumorigenic and metastatic, suggesting that …	info:pmid/11095464#abs:12, info:pmid/16386354#abs:10, info:pmid/12550081#abs:2, info:pmid/11020056#abs:9, info:pmid/10984481#body:208, info:pmid/11751884#body:122, info:pmid/22909219#cont:172, info:pmid/16018936#body:13	2	8
HIF1A --+> CANCER	Regulation	HIF-1a is likely to play a role in progressive prostate cancer., These results show that over-expression of HIF-1alpha directly stimulates the invasive potency of human prostate carcinoma LNCaP cells through the matrix gel., [Role of beta-catenin signaling pathway in EMT of human prostate cancer induced by HIF-1alpha]., Role of Wnt/beta-catenin signaling pathway in epithelial-mesenchymal transiti…	info:pmid/21896985#abs:10, info:pmid/16956360#abs:9, info:pmid/20646434#title:1, info:pmid/17956532#title:1, info:pmid/22084938#cont:34, info:doi/10.1016/j.yjmcc.2007.04.001#body:127	2	6
EGFR ---| CANCER	Regulation	ERRP could potentially be an effective therapeutic agent for prostate cancer., Autocrine production of transforming growth factor alpha and overexpression of the epidermal growth factor receptor (EGFR) may contribute to androgen-independent prostatic cancer growth at both primary and metastatic sites., This study shows that EGFR and MDM2 play a critical role in the growth of prostate cancer, espe…	info:pmid/15634655#abs:11, info:pmid/8706005#abs:1, info:pmid/15269162#abs:10, info:pmid/22384099#abs:8, info:pmid/15897236#abs:2	2	5
STAT5A --+> CANCER	Regulation	Moreover, we show that Stat5a/b is critical for human prostate cancer xenograft growth in nude mice., We propose that blocking Stat5 function may represent a novel therapeutic approach for prostate cancer., Signal transducer and activator of transcription 5a/b (Stat5a/b) controls viability and growth of prostate cancer., Pharmacologic targeting of Stat5 is a rational approach to delay castrate-re…	info:pmid/18316550#abs:11, info:pmid/12719422#abs:8, info:pmid/21704724#abs:2, info:pmid/21216933#abs:2, info:pmid/21416055#abs:3, info:pmid/20854925#abs:7, info:pmid/22148584#abs:1, info:pmid/20167868#abs:5, info:pmid/18508994#body:194	2	9
PTEN ---> CANCER	Regulation	The frequency of PTEN inactivation appears to increase during the progression of prostatic cancer., Androgen receptor and PTEN both have been well documented to have important roles in prostate carcinogenesis., PTEN loss is considered to be a key event in prostate carcinogenesis but the mechanisms of loss remain to be fully elucidated., These findings suggest that the PTEN gene and its regulated …	info:pmid/12717346#abs:3, info:pmid/21532617#abs:2, info:pmid/22460813#abs:2, info:pmid/11495901#abs:12, info:pmid/11103942#abs:3, info:pmid/18708577#abs:4, info:pmid/15829377#abs:7, info:pmid/19281769#abs:1, info:pmid/12684422#abs:2, info:pmid/20626841#abs:1	2	10
PIK3CB ---> CANCER	Regulation	Most strikingly, in an animal model of prostate tumour formation induced by Pten loss, ablation of p110beta (also known as Pik3cb), but not that of p110alpha (also known as Pik3ca), impeded tumorigenesis with a concomitant diminution of Akt phosphorylation., Here, we have probed the ability of an activated allele of p110ß to induce prostatic tumors., Phosphoinositide 3-OH kinase p85alpha and p110…	info:pmid/18594509#abs:8, info:pmid/20534477#body:51, info:pmid/18372911#title:1, info:pmid/20368419#body:207	2	4
MYC --+> CANCER	Regulation	PIM1 kinase and MYC are commonly co-expressed in human prostate cancer and synergize to induce rapidly progressing prostate cancer in mouse models., These results suggest that while both p53 and c-myc may play a role in prostatic carcinogenesis, neither appears to identify patients who may benefit from treatment in stage A disease., The mechanism of down-regulation of c-myc RNA associated with an…	info:pmid/21860423#abs:1, info:pmid/8326591#abs:4, info:pmid/1373070#abs:1, info:pmid/19578399#abs:9, info:pmid/23001181#abs:3, info:pmid/22713676#abs:6, info:pmid/20140016#abs:6, info:pmid/22144662#title:1, info:pmid/19164469#body:72, info:pmid/20515470#body:248	2	10
